# Supplementary material for: Performance Comparison of Bench-Top Next Generation Sequencers Using Microdroplet PCR-Based Enrichment for Targeted Sequencing in Patients with Autism Spectrum Disorder
Source: PubMed Central journal article supplement (PMC3774667; doi:10.1371/journal.pone.0074167), 2013-09-16
Supplement: pone.0074167.s003.pdf [file pone.0074167.s003.pdf]

Table S1 RainDance ASDSeq™ Core Research Screening Panel

| Gene                 | Chromosome |
|----------------------|------------|
| <i>SLC2A1</i>        | 1          |
| <i>MBD5</i>          | 2          |
| <i>NRXN1</i>         | 2          |
| <i>SCN1A</i>         | 2          |
| <i>ZEB2</i>          | 2          |
| <i>FOXP1</i>         | 3          |
| <i>MEF2C</i>         | 5          |
| <i>NIPBL</i>         | 5          |
| <i>NSD1</i>          | 5          |
| <i>BRAF</i>          | 7          |
| <i>CNTNAP2</i>       | 7          |
| <i>FOXP2</i>         | 7          |
| <i>HOXA1</i>         | 7          |
| <i>MET</i>           | 7          |
| <i>RELN</i>          | 7          |
| <i>CHD7</i>          | 8          |
| <i>COH1-VPS13B</i>   | 8          |
| <i>EHMT1</i>         | 9          |
| <i>TSC1</i>          | 9          |
| <i>PTEN</i>          | 10         |
| <i>BDNF</i>          | 11         |
| <i>DHCR7</i>         | 11         |
| <i>FOLR1</i>         | 11         |
| <i>AVPR1A</i>        | 12         |
| <i>CACNA1C</i>       | 12         |
| <i>PTPN11</i>        | 12         |
| <i>FOXP1</i>         | 14         |
| <i>GABRB3</i>        | 15         |
| <i>UBE3A</i>         | 15         |
| <i>CREBBP</i>        | 16         |
| <i>TSC2</i>          | 16         |
| <i>PAFAH1B1</i>      | 17         |
| <i>RAI1</i>          | 17         |
| <i>SLC6A4</i>        | 17         |
| <i>TCF4</i>          | 18         |
| <i>PNKP</i>          | 19         |
| <i>SHANK3</i>        | 22         |
| <i>AP1S2</i>         | X          |
| <i>ARX</i>           | X          |
| <i>ATRX</i>          | X          |
| <i>CASK</i>          | X          |
| <i>CDKL5</i>         | X          |
| <i>DMD</i>           | X          |
| <i>FGD1</i>          | X          |
| <i>FMR1</i>          | X          |
| <i>HPRT1</i>         | X          |
| <i>JARID1C-KDM5C</i> | X          |
| <i>L1CAM</i>         | X          |
| <i>MECP2</i>         | X          |
| <i>MED12</i>         | X          |
| <i>MID1</i>          | X          |
| <i>NHS</i>           | X          |
| <i>NLGN3</i>         | X          |
| <i>NLGN4X</i>        | X          |
| <i>OPHN1</i>         | X          |
| <i>PCDH19</i>        | X          |
| <i>PHF6</i>          | X          |
| <i>PQBP1</i>         | X          |
| <i>PTCHD1</i>        | X          |
| <i>RAB39B</i>        | X          |
| <i>SLC9A6</i>        | X          |
| <i>SMC1A</i>         | X          |
