# Supplementary material for: Performance Comparison of Bench-Top Next Generation Sequencers Using Microdroplet PCR-Based Enrichment for Targeted Sequencing in Patients with Autism Spectrum Disorder
Source: PubMed Central journal article supplement (PMC3774667; doi:10.1371/journal.pone.0074167), 2013-09-16
Supplement: pone.0074167.s004.pdf [file pone.0074167.s004.pdf]

Table S2 Summary of SNP/indel detection with PGM and MiSeq

|       | All reads             |        |                         |                   | Reads with mapping quality above 40 |        |                         |                   |
|-------|-----------------------|--------|-------------------------|-------------------|-------------------------------------|--------|-------------------------|-------------------|
|       | Total SNPs and indels | Indels | % indels of total calls | Indels/1kb/sample | Total SNPs and indels               | Indels | % indels of total calls | Indels/1kb/sample |
| PGM   | 9685                  | 5544   | 57.2%                   | 1.340             | 7574                                | 5288   | 69.8%                   | 1.270             |
| MiSeq | 3818                  | 395    | 10.3%                   | 0.096             | 3553                                | 386    | 10.9%                   | 0.093             |
