# Supplementary material for: Performance Comparison of Bench-Top Next Generation Sequencers Using Microdroplet PCR-Based Enrichment for Targeted Sequencing in Patients with Autism Spectrum Disorder
Source: PubMed Central journal article supplement (PMC3774667; doi:10.1371/journal.pone.0074167), 2013-09-16
Supplement: pone.0074167.s005.pdf [file pone.0074167.s005.pdf]

Table S3 Summary of target resequencing and prioritization

|                                                               | PGM   | MiSeq |
|---------------------------------------------------------------|-------|-------|
| Total unknown variants identified from 28 patients with ASD*  | 98    | 64    |
| Nonsynonymous SNVs                                            | 62    | 46    |
| Non-segmentally duplicated SNVs                               | 60    | 44    |
| SNVs with a frequency $\leq 1\%$ (in NHIBL ESP5400 dataset)   | 60    | 44    |
| SNVs with a frequency $\leq 1\%$ (in in-house control exomes) | 57    | 30    |
| True positive calls (confirmed by Sanger sequencing)          | 21    | 22    |
| False positive calls                                          | 36    | 8     |
| due to** mutation at read end                                 | 21    | 5     |
| mutation near homopolymer                                     | 14    | 0     |
| low depth (<10)                                               | 27    | 0     |
| sequencer specific error                                      | 1     | 3     |
| True positive call rate (%)                                   | 36.8% | 73.3% |

\* After excluding low quality calls, detected variants were filtered by dbSNP135 (or lower versions of dbSNPs) which were flagged as common without clinical association.

\*\* More than one reason for one false positive call.
