# Supplementary material for: Performance Comparison of Bench-Top Next Generation Sequencers Using Microdroplet PCR-Based Enrichment for Targeted Sequencing in Patients with Autism Spectrum Disorder
Source: PubMed Central journal article supplement (PMC3774667; doi:10.1371/journal.pone.0074167), 2013-09-16
Supplement: pone.0074167.s006.pdf [file pone.0074167.s006.pdf]

Table S4 Clinical features of patients with novel SNVs

| Patient | Current Age | Sex | Age at Onset | Severity* | IQ  | Complications  |
|---------|-------------|-----|--------------|-----------|-----|----------------|
| A682    | 11          | M   | unknown      | mild      | 93  | epilepsy       |
| A681    | 9           | F   | unknown      | mild      | 118 | epilepsy       |
| A634    | 16          | M   | 1            | Severe    | 37  | -              |
| A447    | 14          | M   | 1            | Severe    | 32  | -              |
| A479    | 15          | M   | 1            | Severe    | 36  | -              |
| A621    | 12          | M   | 1            | mild      | 60  | nocturia       |
| A668    | 14          | M   | 1            | Severe    | 18  | -              |
| A669    | 6           | M   | 1            | mild      | 68  | -              |
| A711    | 8           | F   | 1            | Severe    | 20  | sleep disorder |
| A464    | 11          | M   | 1            | Severe    | 75  | -              |
| A627    | 11          | F   | 1            | Severe    | 30  | obesity        |
| A651    | 10          | M   | 1            | Severe    | 30  | sleep disorder |
| A674    | 6           | F   | 1            | Severe    | 30  | -              |
| A663    | 11          | M   | 1            | Severe    | 15  | epilepsy       |
| A653    | 4           | M   | 1            | Severe    | 40  | -              |
| A695    | 9           | M   | 1            | Severe    | 47  | -              |
| A647    | 9           | M   | 1            | Severe    | 40  | -              |
| A619    | 12          | M   | 1            | Severe    | 40  | obesity        |

\*Severity for each patient was clinically judged, referring ASD rating scales such as Social Responsiveness Scale (SRS).
