# Supplementary material for: Performance Comparison of Bench-Top Next Generation Sequencers Using Microdroplet PCR-Based Enrichment for Targeted Sequencing in Patients with Autism Spectrum Disorder
Source: PubMed Central journal article supplement (PMC3774667; doi:10.1371/journal.pone.0074167), 2013-09-16
Supplement: pone.0074167.s007.pdf [file pone.0074167.s007.pdf]

Table S5 Multiple mutations detected in patients with ASD

| Patient | Gene           | Nucleotide : amino acid change |
|---------|----------------|--------------------------------|
| A663    | <i>RAI1</i>    | c.C1148C>T;p.P383L             |
|         | <i>VPS13B</i>  | c.T820T>G;p.F274V              |
| A668    | <i>SHANK3</i>  | c.3127C>T;p.L1043F             |
|         | <i>DMD</i>     | c.3479A>G;p.N1160S             |
|         | <i>DMD</i>     | c.2473A>G;p.M825V              |
| A634    | <i>CHD7</i>    | c.7880G>A;p.R2627Q             |
|         | <i>RAI1</i>    | c.4238T>C;p.M1413T             |
| A674    | <i>PNKP</i>    | c.56C>T;p.A19V                 |
|         | <i>SLC6A4</i>  | c.878C>T;p.S293F               |
| A681    | <i>CACNA1C</i> | c.4706C>T;p.P1569L             |
|         | <i>NIPBL</i>   | c.1553C>T;p.T518I              |
