# Supplementary material for: Performance Comparison of Bench-Top Next Generation Sequencers Using Microdroplet PCR-Based Enrichment for Targeted Sequencing in Patients with Autism Spectrum Disorder
Source: PubMed Central journal article supplement (PMC3774667; doi:10.1371/journal.pone.0074167), 2013-09-16
Supplement: pone.0074167.s008.pdf [file pone.0074167.s008.pdf]

Table S6 Comparison of PGM and MiSeq analysis cost and expected yield

|                                        | Illumina MiSeq       | Ion Torrent PGM         |
|----------------------------------------|----------------------|-------------------------|
| System cost                            | ¥18,800,000          | ¥11,400,000             |
| Read length (bp)                       | 150 x 2 <sup>*</sup> | 100                     |
| Sequence yield per run                 | 1.5-2G               | 100-200Mb <sup>**</sup> |
| Base call quality                      | >Q30                 | >Q20                    |
| Typical DNA requirement for sequencing | 50-1000ng            | 100-1000ng              |
| Run time (hr)                          | 27                   | 2                       |
| <b>In this study <sup>***</sup></b>    |                      |                         |
| Sequencing cost per sample             | ¥32,166              | ¥77,000                 |
| Sample enrichment cost per sample      | ¥68,000              | ¥68,000                 |
| Run cost per sample                    | ¥100,166             | ¥145,000                |
| Run time / sample (hr)                 | 4.5                  | 2                       |

\* Using MiSeq Reagent Kit (300 cycle). \*\* Using 316 chip. \*\*\* Six samples were multiplexed in MiSeq run.

Approximately \$1=¥100
